# Supplementary material for: Unveiling the synergistic effect of precursor stoichiometry and interfacial reactions for perovskite light-emitting diodes
Source: PubMed Central journal article supplement (PMC6597563; doi:10.1038/s41467-019-10612-3), 2019-06-27
Supplement: 41467_2019_10612_MOESM1_ESM.pdf [file 41467_2019_10612_MOESM1_ESM.pdf]

## Supplementary Information

**Unveiling the synergistic effect of precursor stoichiometry and interfacial reactions for perovskite light-emitting diodes**

Yuan et al.

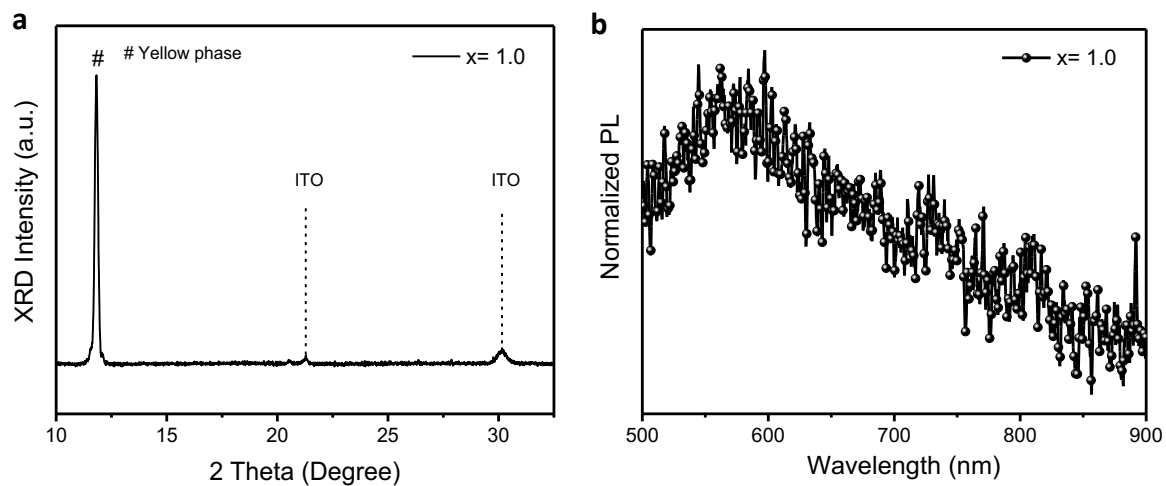

**Supplementary Figure 1. Perovskite film processed from stoichiometric precursor. a-b,** XRD pattern (a) and PL spectrum (b) of perovskite film processed from precursor solution with stoichiometric ratio ( $x=1$ ).

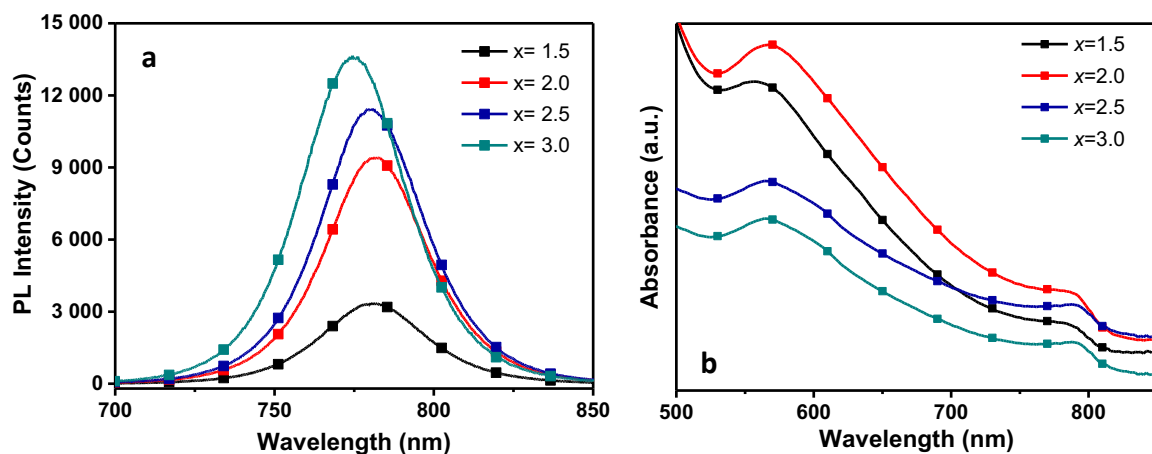

**Supplementary Figure 2. Optical properties of perovskite films. a-b, PL (a) and UV-vis absorption spectra (b) of perovskite films processed from precursors with different  $x$  values ( $x = 1.5, 2.0, 2.5$  and  $3.0$ ) after thermal annealing.**

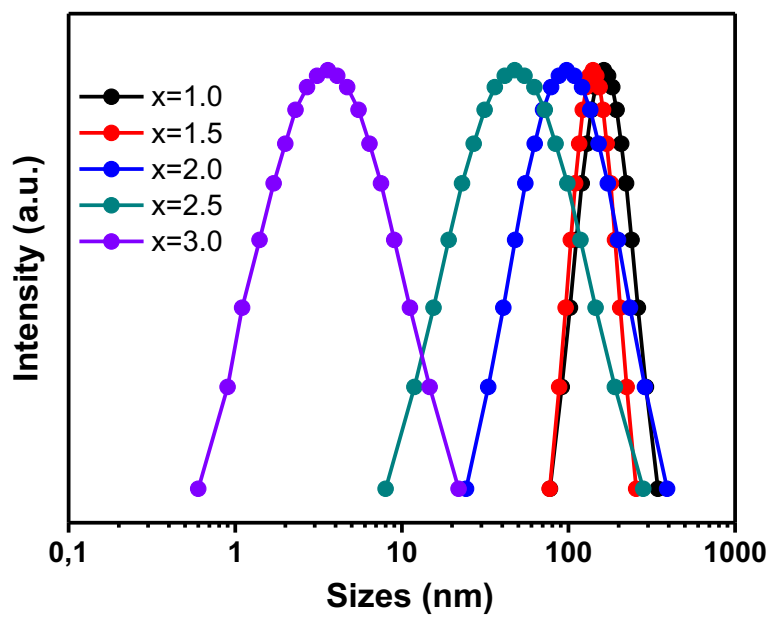

**Supplementary Figure 3. Sizes of colloids in the perovskite precursors.** Dynamic light scattering (DLS) results of the mixed-cation perovskite precursors with different  $x$  values.

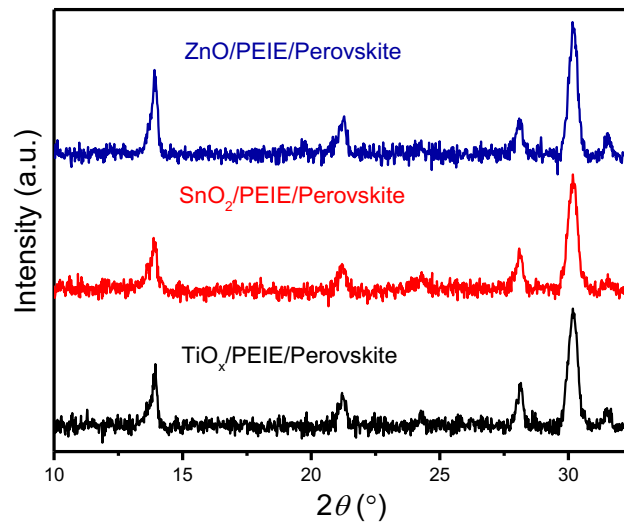

**Supplementary Figure 4. Crystallinity of perovskite films on different substrates.** XRD patterns of thermal annealed (100 °C for 10 min) perovskite films ( $x = 2.5$ ) on TiO<sub>x</sub>/PEIE, SnO<sub>2</sub>/PEIE and ZnO/PEIE substrates.

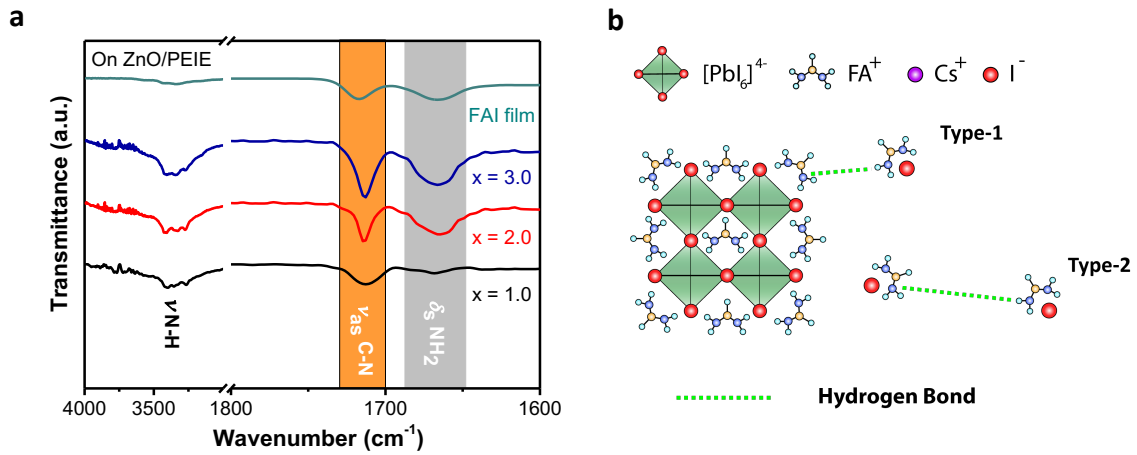

**Supplementary Figure 5. FTIR characterization results.** **a**, FTIR spectra of pristine FAI and perovskite films with different  $x$  values on ZnO/PEIE substrates. **b**, Formation of the hydrogen bond in the perovskite film: Type-1: the FAI molecules stay at the surface of the crystals form hydrogen bonds with free-standing FAI in the neighbouring area. Type-2: the free-standing FAI molecules form hydrogen bonds with each other.

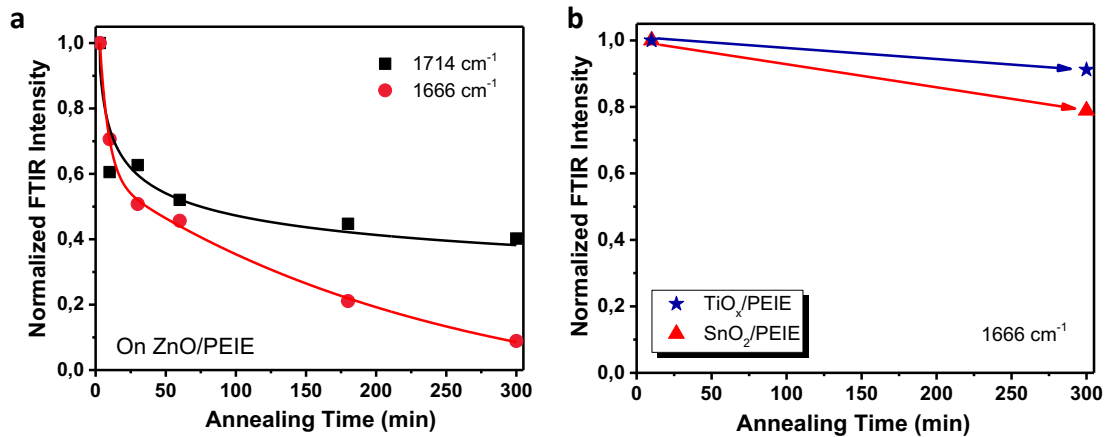

**Supplementary Figure 6. Evolution of FTIR peak intensity of perovskite film on different substrates. a**, Intensity evolution of  $\nu_s$  NH<sub>2</sub> (1666 cm<sup>-1</sup>) and  $\nu_{as}$  C-N (1714 cm<sup>-1</sup>) with the annealing time for perovskite films on the ZnO/PEIE substrate. **b**, Intensity of  $\nu_s$  NH<sub>2</sub> (1666 cm<sup>-1</sup>) after different annealing time for perovskite films on TiO<sub>x</sub>/PEIE and SnO<sub>2</sub>/PEIE substrates.

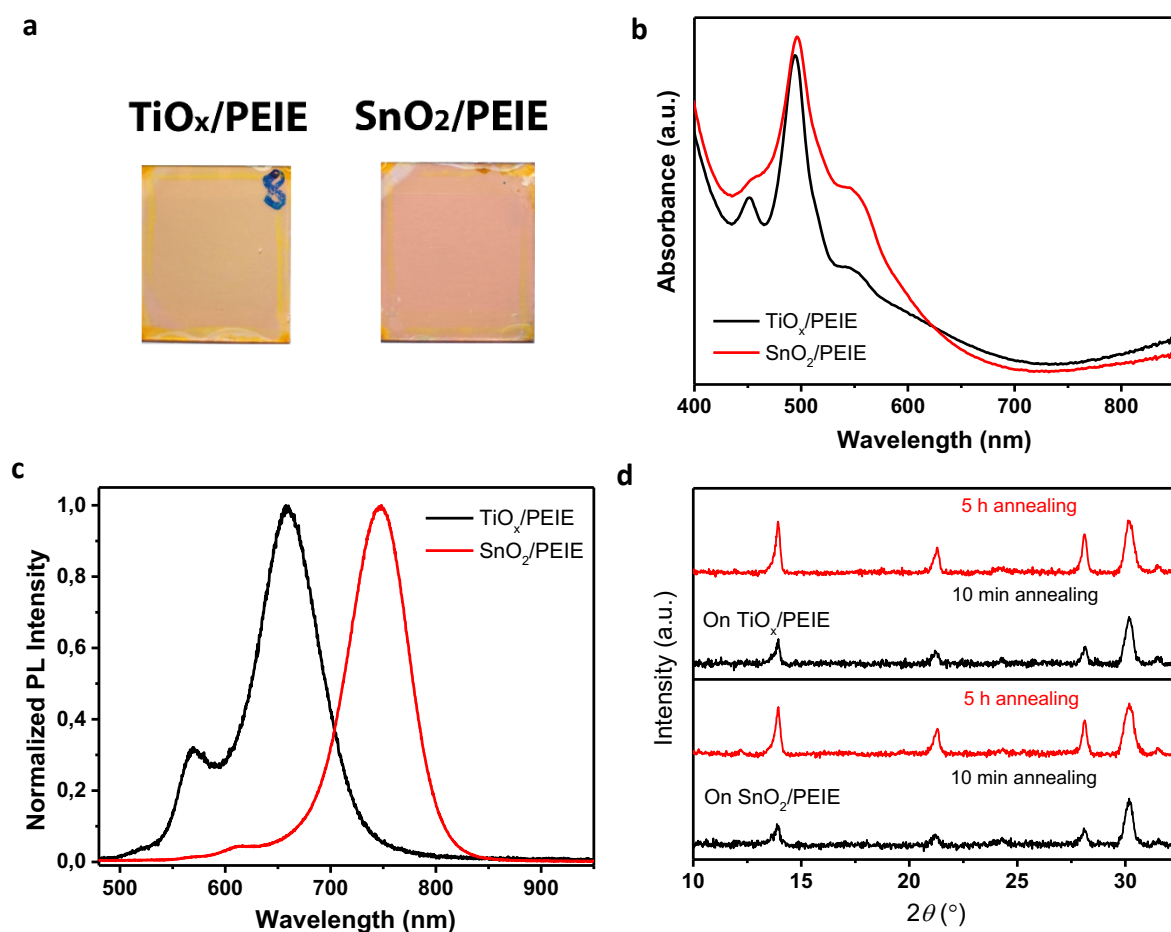

**Supplementary Figure 7. Films on TiO<sub>x</sub>/PEIE and SnO<sub>2</sub>/PEIE with prolonged annealing.** **a-c**, Photographs (**a**), UV-vis absorption spectra (**b**) and normalized PL spectra (**c**) of perovskite films ( $x = 2.5$ ) that annealed for 5 h on TiO<sub>x</sub>/PEIE and SnO<sub>2</sub>/PEIE substrates. **d**, XRD patterns of the perovskite films on TiO<sub>x</sub>/PEIE and SnO<sub>2</sub>/PEIE substrates after 10 min and 5 h thermal annealing.



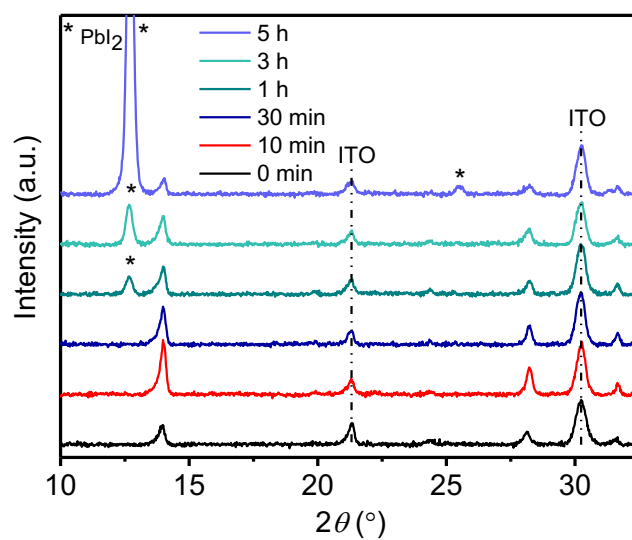

**Supplementary Figure 8. Perovskite film on ZnO/PEIE substrate.** XRD patterns of the as-deposited precursor complex ( $x = 2.5$ , 0 min) and the obtained perovskite films with different annealing time.

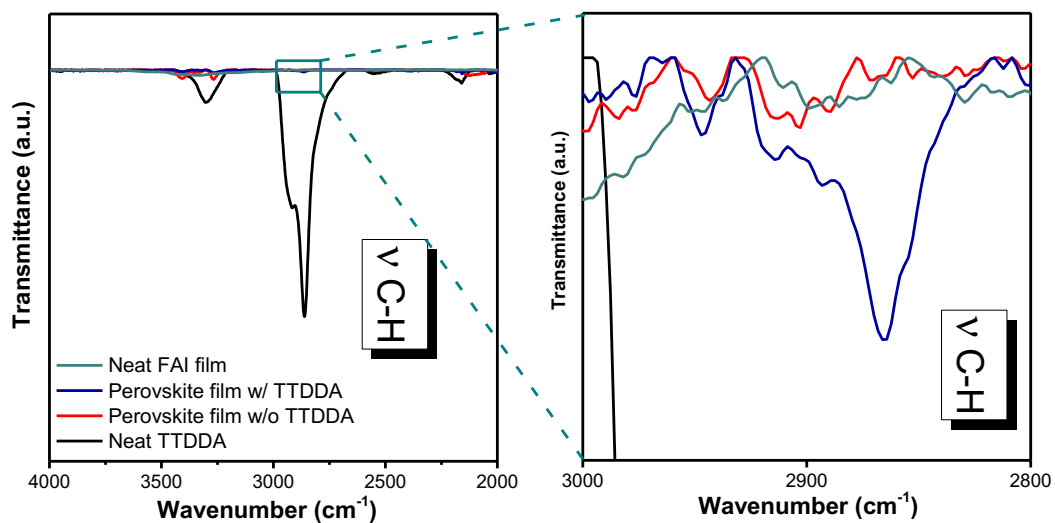

**Supplementary Figure 9. FTIR spectra of neat TTDDA, FAI films, perovskite films ( $x = 2.5$ ) with and without TTDDA passivation.** The FTIR peak locating at  $2870\text{ cm}^{-1}$  is ascribed to the stretching of C-H ( $\nu\text{ C-H}$ ) from the DDTTA chain. The right one is the zoom-in result of the FTIR spectra in the range of  $2800\text{-}3000\text{ cm}^{-1}$ .

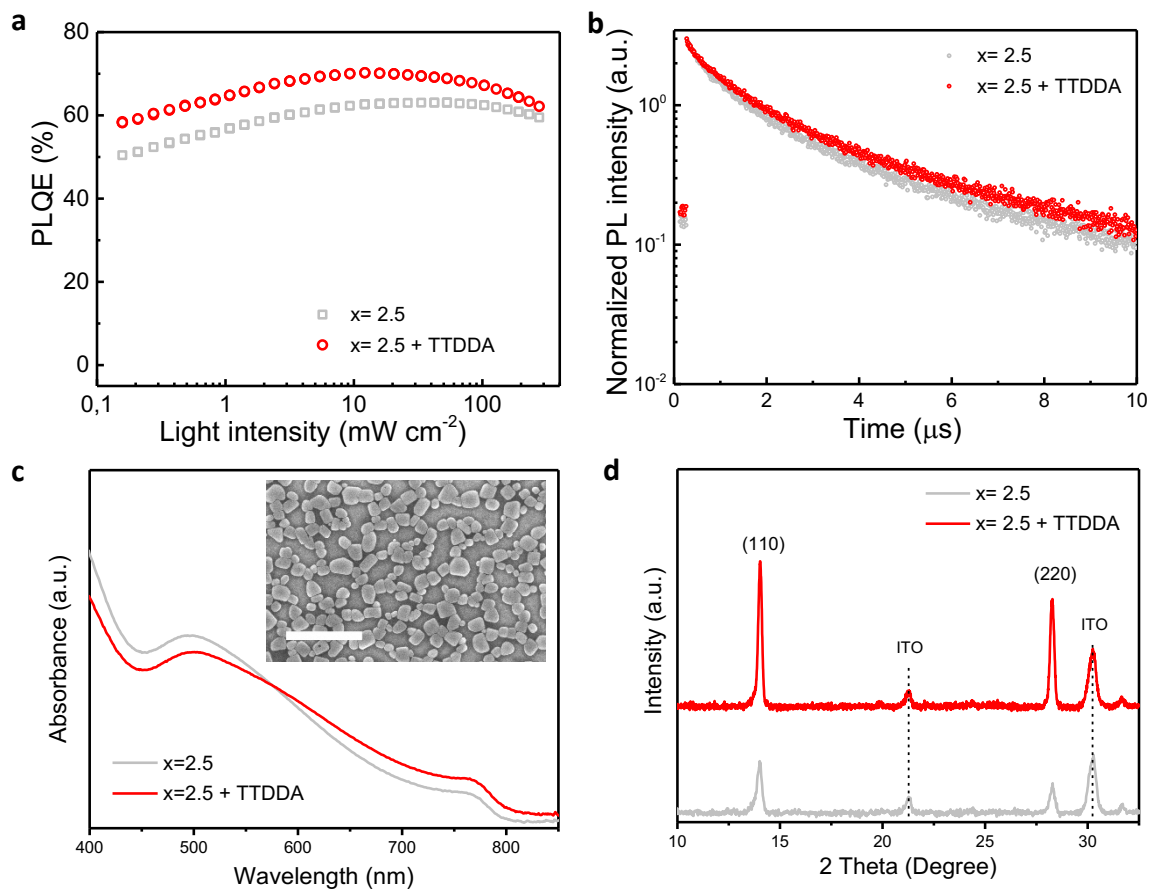

**Supplementary Figure 10. Characterizations of perovskite film with TTDDA passivation.**

**a-d**, Light-intensity dependent PLQEs (**a**), PL decay curves (**b**), UV-vis absorption spectra (inset shows the SEM image) (**c**) and XRD patterns (**d**) of perovskite films ( $x = 2.5$ ) with TTDDA passivation. The results of pristine perovskite films without TTDDA are shown as the grey curves for comparison. Scale bar in the inset is 2 μm.

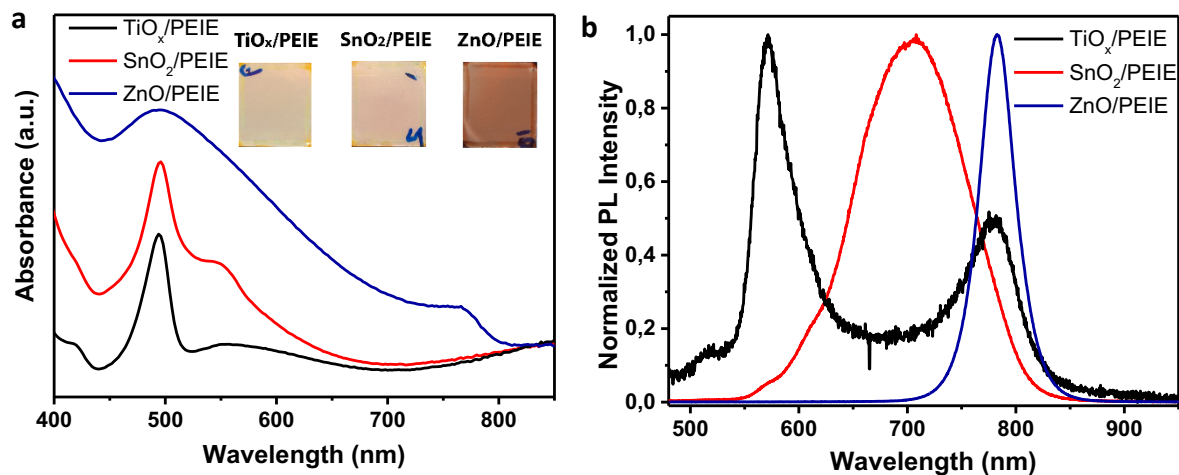

**Supplementary Figure 11. Perovskite films ( $x=2.5$ ) with TTDDA on different substrates.**

**a-b**, UV-vis absorption (**a**) and normalized PL spectra (**b**) of perovskite films on  $\text{TiO}_x/\text{PEIE}$ ,  $\text{SnO}_2/\text{PEIE}$  and  $\text{ZnO}/\text{PEIE}$  substrates, processed from precursors with TTDDA passivation molecule. Insets show images of the thermal-annealed perovskite films on the different substrates.

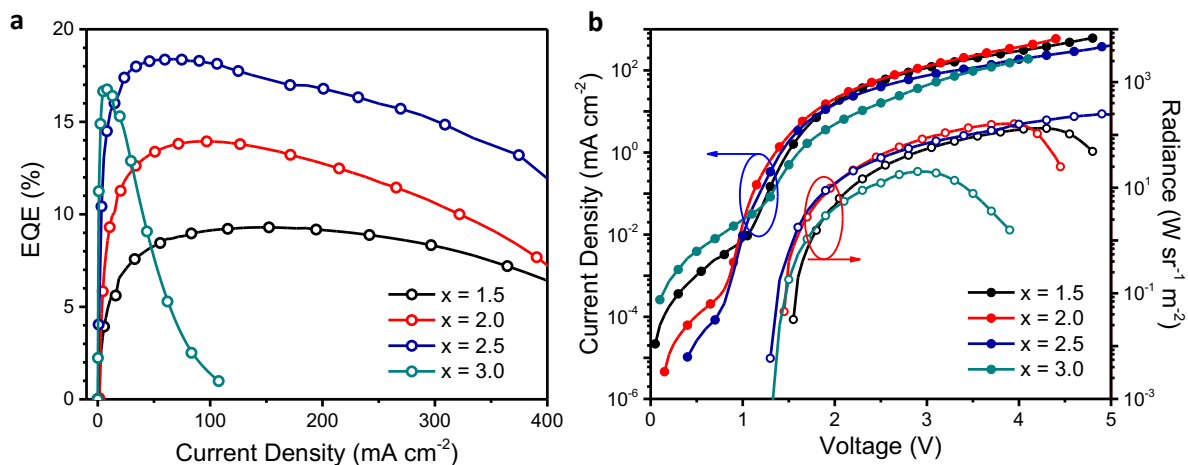

**Supplementary Figure 12. Device performance of perovskite LEDs with TTDDA passivation. a-b, EQE- $J$  (a) and  $J$  &  $R$ - $V$  (b) curves of the perovskite LEDs processed from TTDDA-containing precursors with different  $x$  values.**

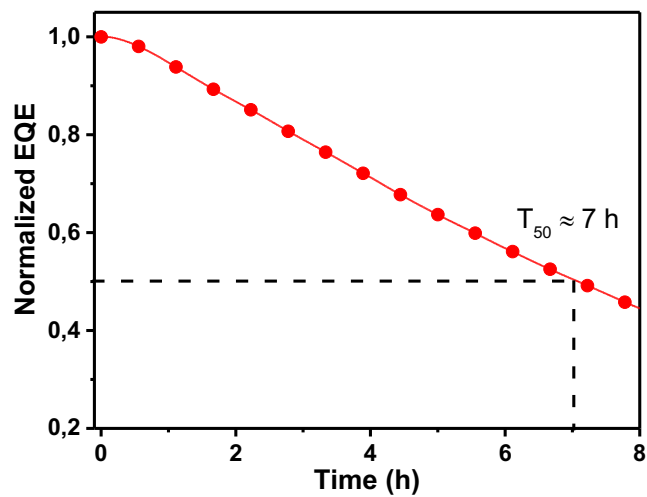

**Supplementary Figure 13. Device stability.** Operational stability of the optimized perovskite LEDs processed from precursor ( $x=2.5$ ) with TTDDA passivation molecule under a constant current density of  $20 \text{ mA cm}^{-2}$ .

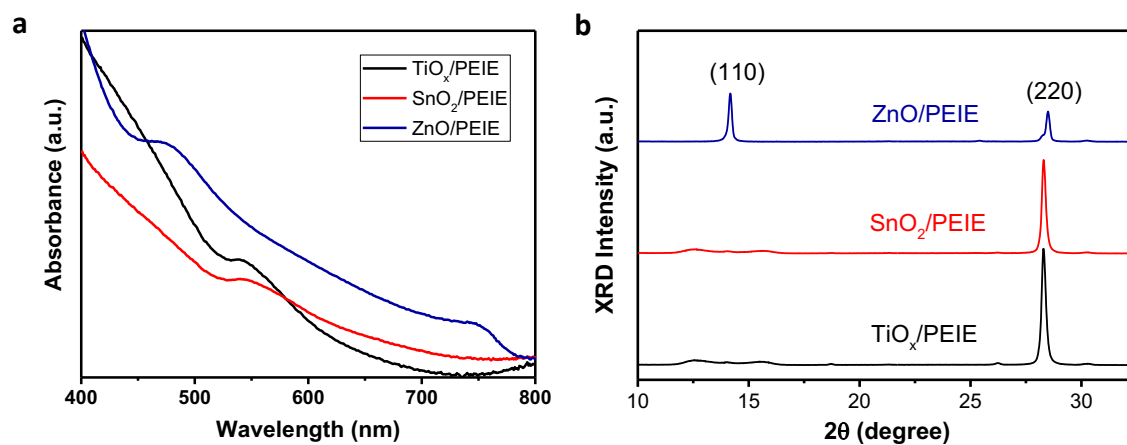

**Supplementary Figure 14. Film characterization of MA-based perovskite films. a-b,** UV-vis absorption spectra (a) and XRD patterns (b) of thermal-annealed MA-based perovskite films on different substrates.

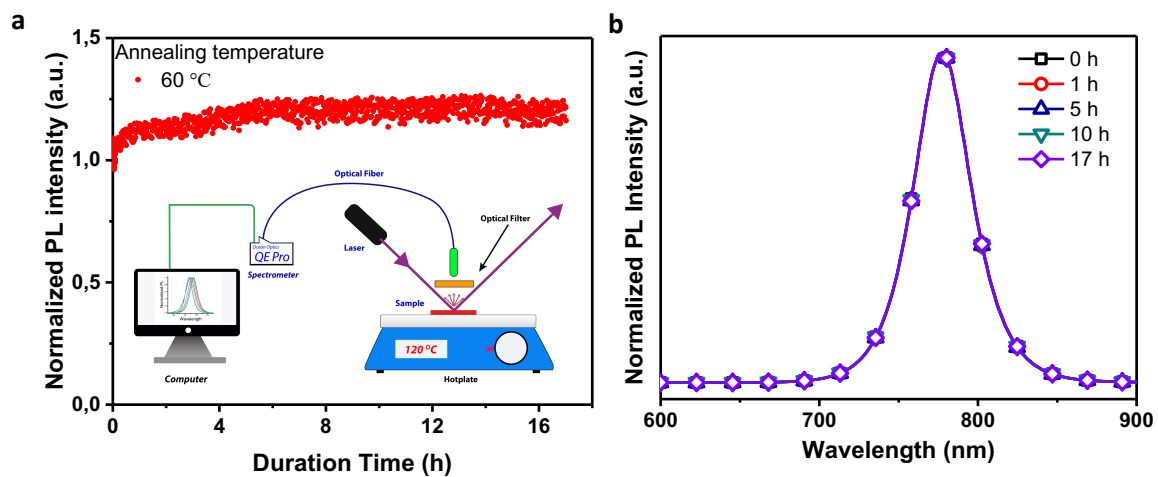

**Supplementary Figure 15. Optical stability of perovskite film on ZnO/PEIE.** **a**, PL intensity evolution of perovskite film on ZnO/PEIE at 60 °C as a function of the heating time. Inset shows the schematic of the *in-situ* PL characterization setup. **b**, Normalized PL spectra of the perovskite films during the PL characterization.



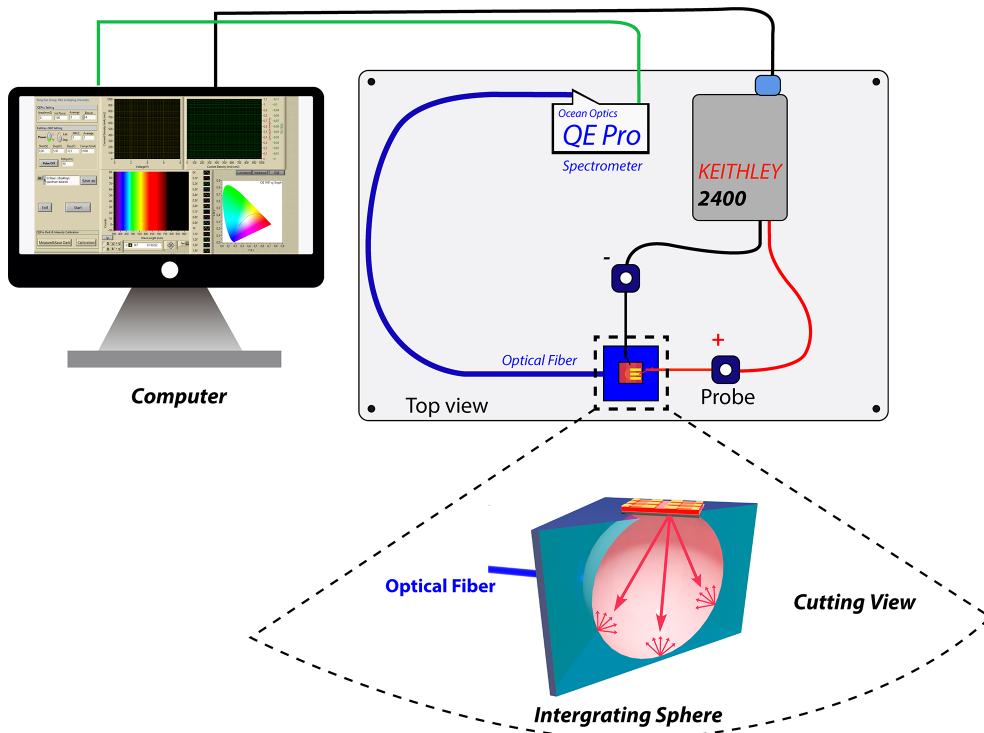

**Supplementary Figure 16. Schematic layout of LEDs characterizations setup.**

**Supplementary Table 1. Device parameters of perovskite LEDs processed from precursors with different component ratios ( $x$ ).**

| $x$ | EQE (%)                               | Radiance ( $\text{W sr}^{-1} \text{m}^{-1}$ ) | EL peak (nm) |
|-----|---------------------------------------|-----------------------------------------------|--------------|
| 1.5 | 4.5 (at $262.8 \text{ mA cm}^{-2}$ )  | 90.2 (at $554.2 \text{ mA cm}^{-2}$ )         | 783.9        |
| 2.0 | 7.1 (at $266.1 \text{ mA cm}^{-2}$ )  | 146.5 (at $524.3 \text{ mA cm}^{-2}$ )        | 782.5        |
| 2.5 | 13.1 (at $193.5 \text{ mA cm}^{-2}$ ) | 206.6 (at $369 \text{ mA cm}^{-2}$ )          | 778.7        |
| 3.0 | 6.4 (at $13.3 \text{ mA cm}^{-2}$ )   | 13.7 (at $64.7 \text{ mA cm}^{-2}$ )          | 775.7        |
